# Supplementary material for: Fungal Diversity and Aflatoxins in Cereals and Cassava-Based Foods From Ondo State, Nigeria
Source: Preprints.org preprint supplement (doi:10.20944/preprints202105.0673.v1), 2021-05-27
Supplement: Supplementary file 3 [file supplementary]

## Sheet: Ekpakpale et el._Species 
Table 1. Numerical values for fungal species diversity in the foods.
S/N			COUNT/RAW DATA					INCIDENCE (%)
		Maize	Pupuru	Rice	All foods		Maize	Pupuru	Rice	All foods
1	Aspergillus aflatoxiformans	4	1	3	8		4.34783	5.55556	5.88235	4.93827
2	Aspergillus brasiliensis	1			1		1.08696			0.617284
3	Aspergillus brunneoviolaceus		1		1			5.55556		0.617284
4	Aspergillus calidoustus		1	1	2			5.55556	1.96078	1.23457
5	Aspergillus chevalieri			2	2				3.92157	1.23457
6	Aspergillus flavus	48	5	28	81		52.1739	27.7778	54.902	50
7	Aspergillus fischeri			1	1				1.96078	0.617284
8	Aspergillus fumigatus		2		2			11.1111		1.23457
9	Aspergillus giganteus		2		2			11.1111		1.23457
10	Aspergillus luchuensis			1	1				1.96078	0.617284
11	Aspergillus melleus		1		1			5.55556		0.617284
12	Aspergillus neoniger	1			1		1.08696			0.617284
13	Aspergillus piperis			1	1				1.96078	0.617284
14	Aspergillus pseudonomiae	1			1		1.08696			0.617284
15	Aspergillus sydowii		2	8	10			11.1111	15.6863	6.17284
16	Aspergillus tamarii	11			11		11.9565			6.79012
17	Aspergillus terreus	1			1		1.08696			0.617284
18	Aspergillus tritici	1		1	2		1.08696		1.96078	1.23457
19	Aspergillus welwitschiae	1		1	2		1.08696		1.96078	1.23457
20	Lichtheimia ramosa	1			1		1.08696			0.617284
21	Penicillium cinamopurpureum	1			1		1.08696			0.617284
22	Penicillium citrinum	21	2	1	24		22.8261	11.1111	1.96078	14.8148
23	Syncephalastrum racemosum		1		1			5.55556		0.617284
24	Syncephalastrum species			1	1				1.96078	0.617284
25	Talaromyces funiculosus			2	2				3.92157	1.23457
26	Talaromyces sayulitensis	1			1		1.08696			0.617284
	TOTAL	92	18	51	162

## Sheet: Ekpakpale et el._Toxigenicity
Table 2. Numerical values for toxigenicity of members of Aspergillus section Flavi in the foods.
				COUNT/RAW DATA
	Maize		Pupuru		Rice		All foods
	Tox	Atox	Tox	Atox	Tox	Atox	Tox	Atox
Aspergillus aflatoxiformans	4		1		3		8
Aspergillus flavus	34	14	4	1	13	15	51	30
Aspergillus pseudonomiae	1						1
Aspergillus tamarii		11						11
	39	25	5	1	16	15	60	41
				INCIDENCE (%)
	Maize		Pupuru		Rice		All foods
	Tox	Atox	Tox	Atox	Tox	Atox	Tox	Atox
Aspergillus aflatoxiformans	10.2564		20		18.75		13.3333
Aspergillus flavus	87.1795	56	80	100	81.25	100	85	73.1707
Aspergillus pseudonomiae	2.5641						1.66667
Aspergillus tamarii		44						26.8293
